# Supplementary material for: Influence of ecological traits on spatio-temporal dynamics of an elasmobranch community in a heavily exploited basin
Source: Research Square preprint supplement (doi:10.21203/rs.3.rs-2175529/v1), 2022-10-21
Supplement: Supplementary file 1 [file 15950b6c6561ed6f88e1b9b1.pdf]

## Supplementary Information

### Influence of ecological traits on spatio-temporal dynamics of an elasmobranch community in a heavily exploited basin

Federico Maioli<sup>1,\*</sup>, Benjamin Weigel<sup>2</sup>, Elettra Chiarabelli<sup>1,3</sup>, Chiara Manfredi<sup>1</sup>, Alessandra Anibaldi<sup>1,3</sup>, Igor Isailovic<sup>4</sup>, Nedo Vrgoc<sup>4</sup>, and Michele Casini<sup>1,5,\*</sup>

<sup>1</sup>University of Bologna, Department of Biological, Geological, and Environmental Sciences, Laboratory of Marine Biology and Fishery, Fano, 61032, Italy

<sup>2</sup>University of Helsinki, Faculty of Biological and Environmental Sciences, Organismal and Evolutionary Biology Research Programme, Research Centre for Ecological Change, Helsinki, 00100, Finland

<sup>3</sup>National Interuniversity Consortium For Marine Sciences, Roma, 00197, Italy

<sup>4</sup>Institute of Oceanography and Fisheries, Split, 21000, Croatia

<sup>5</sup>Swedish University of Agricultural Sciences, Department of Aquatic Resources, Institute of Marine Research, Lysekil, 45330, Sweden

\*Corresponding authors: f.maioli@unibo.it; m.casini@unibo.it, michele.casini@slu.se

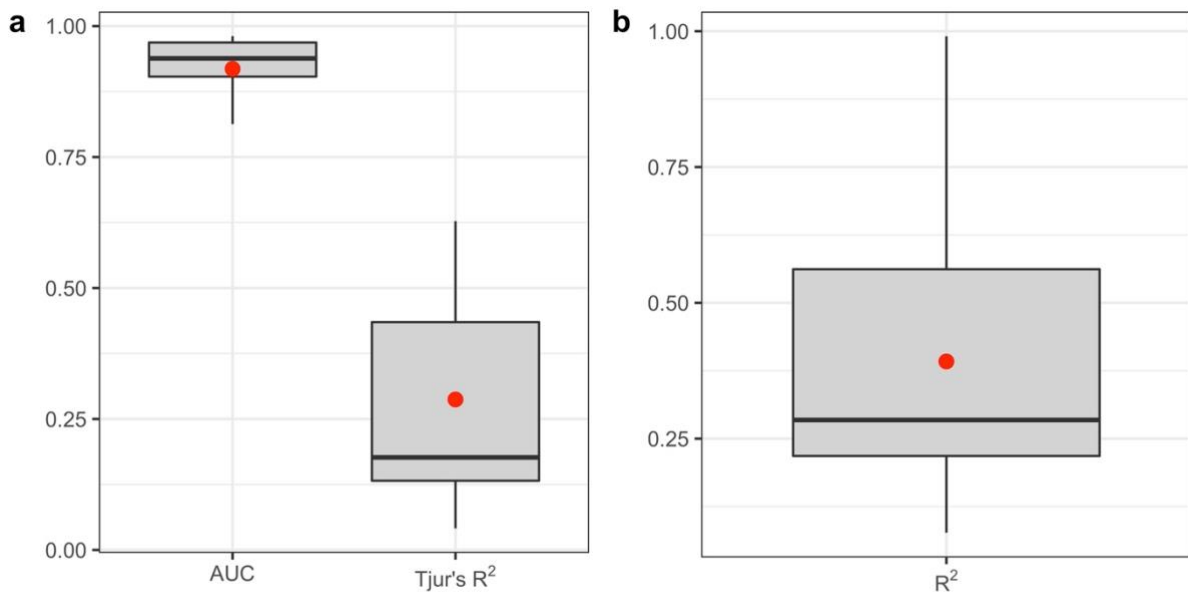

**Figure S1. Boxplots showing the explanatory power.** The panels show the results for the presence-absence (PA) model (a) and for the conditional abundance (ABU) model (b). Data point represents species-specific values. Red dots represent mean values.

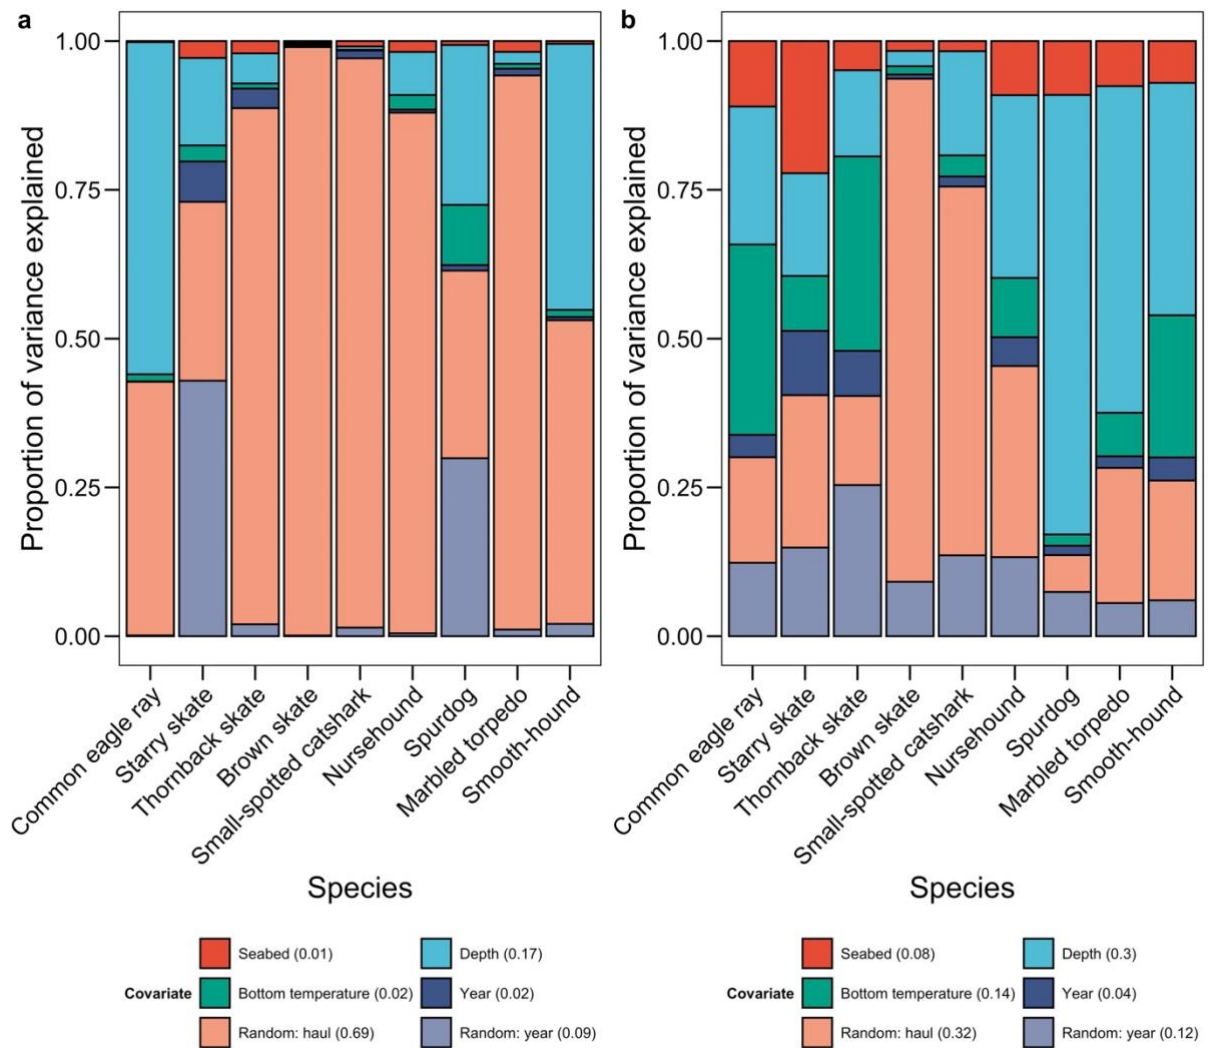

**Figure S2. Variance partitioning among the explanatory variables included in the models.** The panels show the results for the presence-absence model (a) and for the conditional abundance model (b). The explanatory power is measured by  $T_{jur} R^2$  for the presence-absence (PA) model and  $R^2$  for the conditional abundance (ABU) model. The mean variance proportions averaged over the species are reported in brackets alongside the legend. ‘Random: haul’ indicates haul-level spatial random effects, while ‘Random: year’ represents temporal random effects.

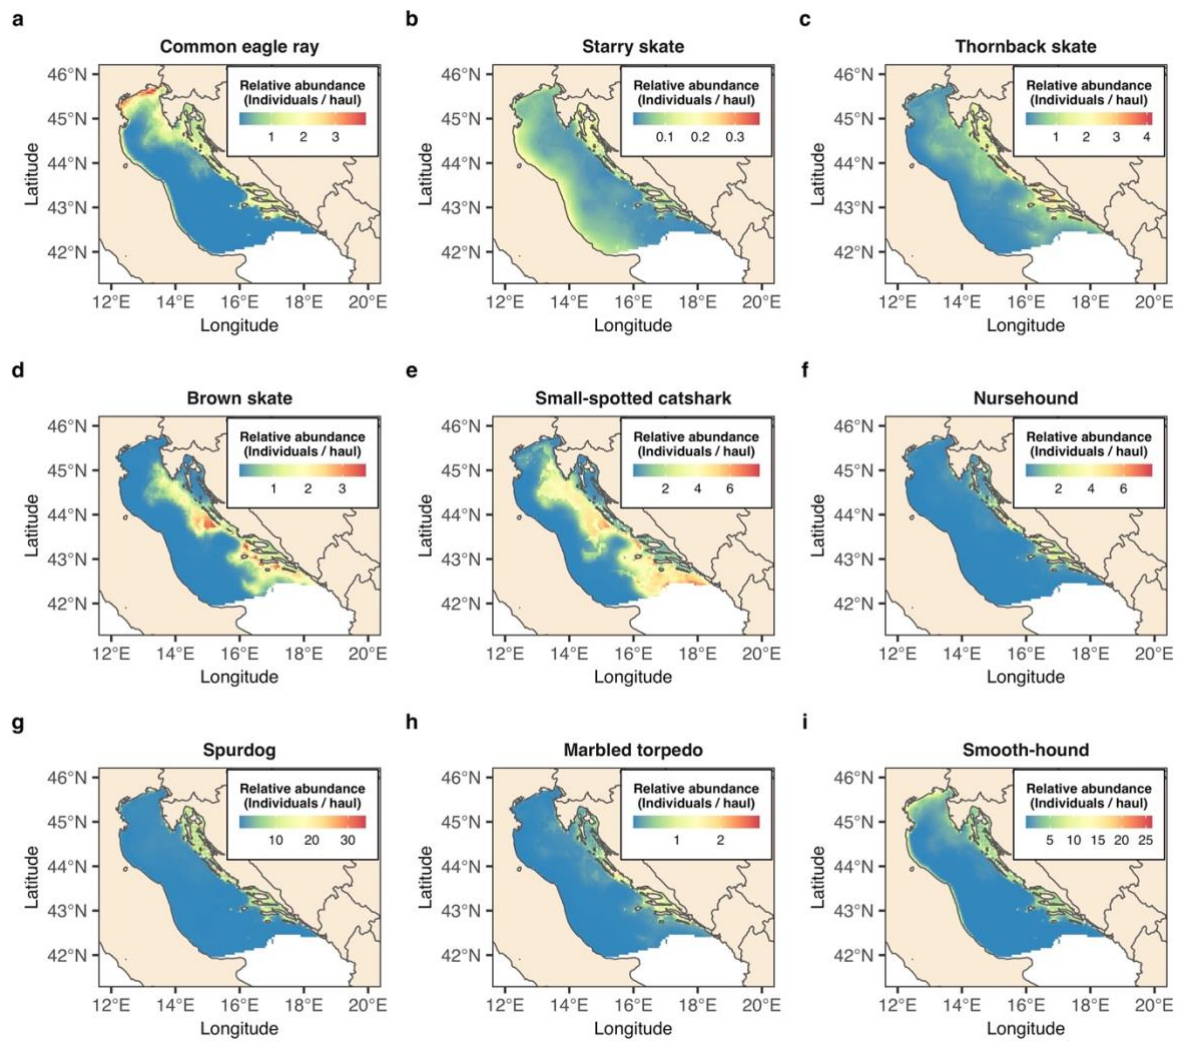

**Figure S3. Predicted species mean abundance across the study area.** Predictions refer to the year 2019. In the predictions, the swept area value was fixed to the mean of the trawl hauls used in the study (i.e., 0.047 km<sup>2</sup>).

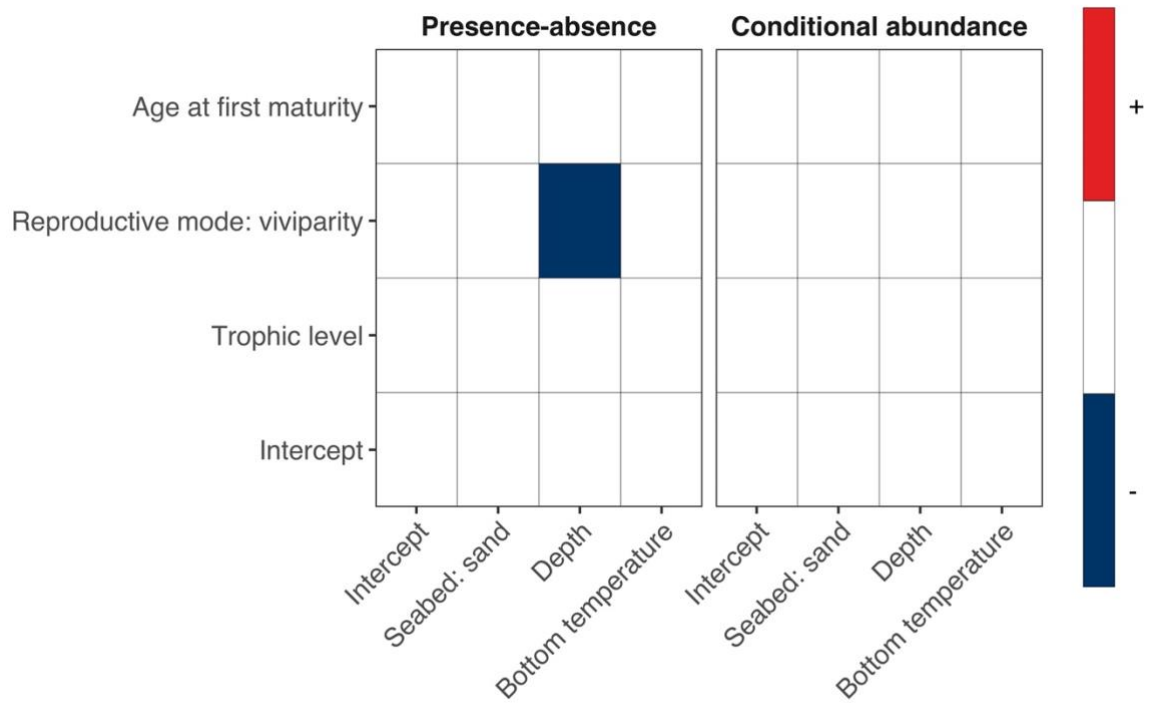

**Figure S4. Heatmap of the estimated  $\gamma$  parameters (regression slopes) which link species traits to species niches.** The left panel represents the presence-absence (PA) model while the right panel the conditional abundance (ABU) model. Blue color indicates parameters that are estimated to be negative with at least 95% posterior probability, while responses that did not gain strong statistical support are shown in white.

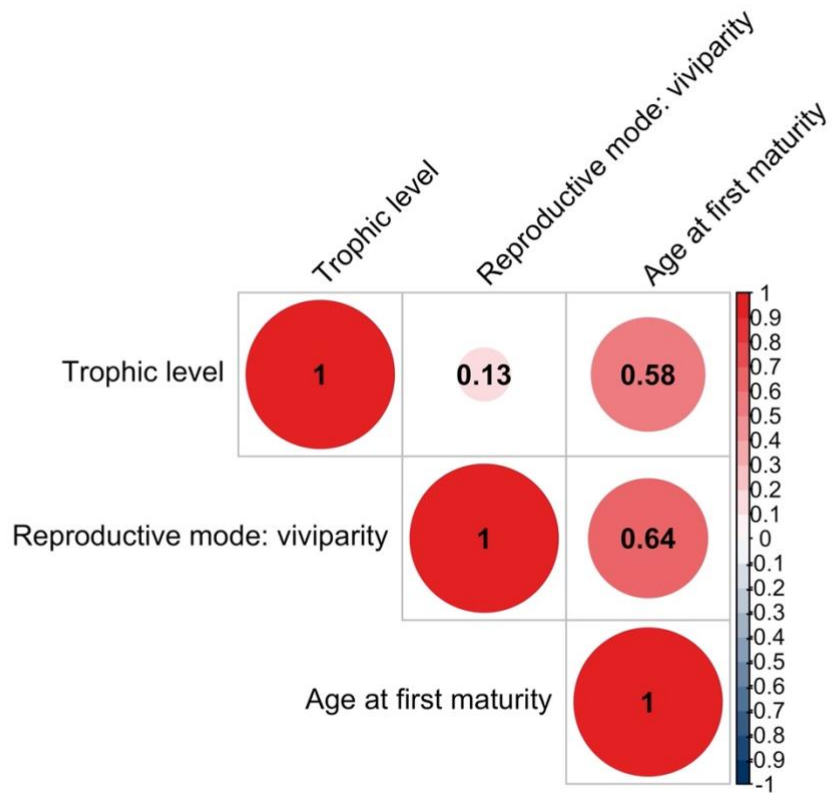

**Figure S5. Pearson pairwise correlation coefficients for the traits included in the analysis.** Red colour indicates positive coefficients, which are reported inside the circles.

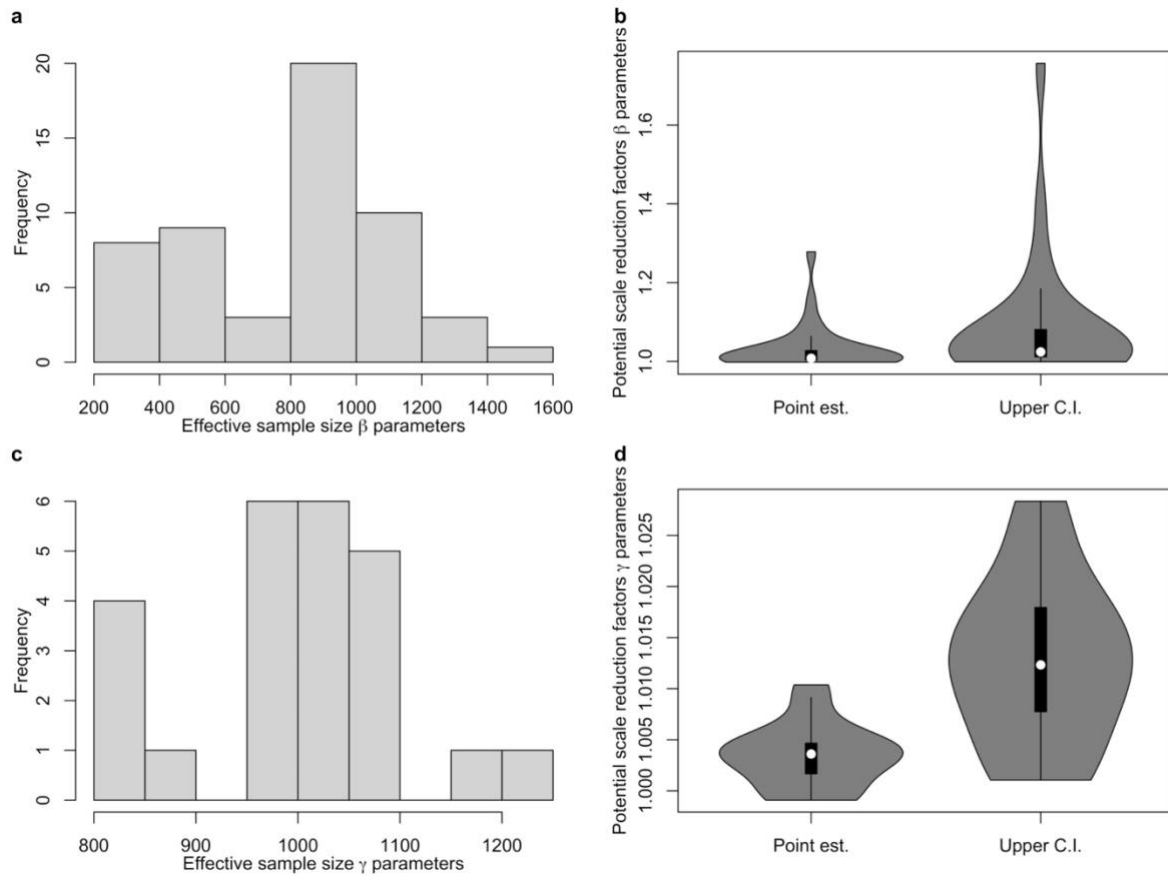

**Figure S6. Model diagnostics for the presence-absence (PA) model.** The panels correspond to the  $\beta$  parameters (a-b) and to the  $\gamma$  parameters (c-d). The panels on the left measure MCMC in terms of the effective sample size and the panels on the right in terms of the potential scale reduction factor.

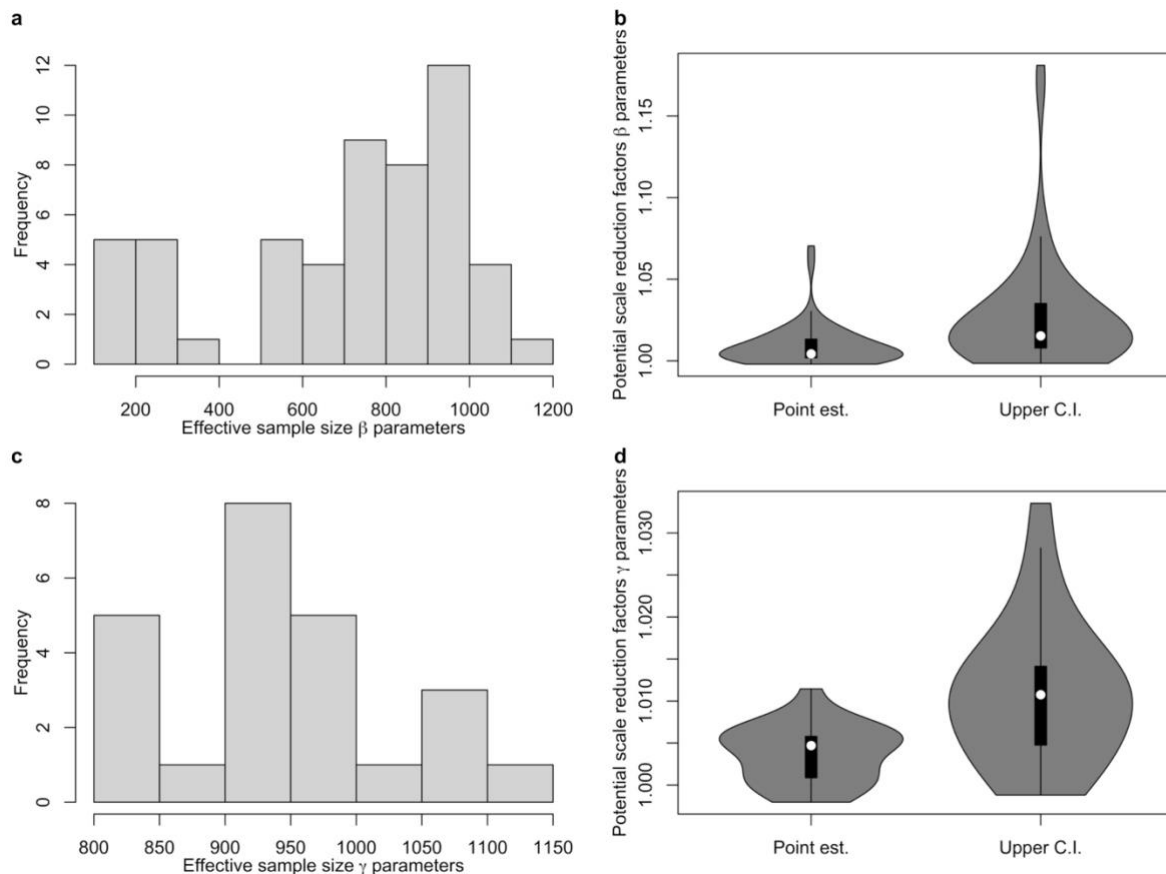

**Figure S7. Model diagnostics for the conditional abundance (ABU) model.** The panels correspond to the  $\beta$  parameters (a-b) and to the  $\gamma$  parameters (c-d). The panels on the left measure MCMC in terms of the effective sample size and the panels on the right in terms of the potential scale reduction factor.

**Table S1 References for the traits considered in the analysis.**

| Species                | Reproductive mode references | Trophic level references    | Age at first maturity references |
|------------------------|------------------------------|-----------------------------|----------------------------------|
| Common eagle ray       | Beukhof et al. (2019)        | Jacobsen et al. (2013)      | Ebert & Dando (2020)             |
| Starry skate           | Beukhof et al. (2019)        | Beukhof, Esther et al. 2019 | Ebert & Dando (2020)             |
| Thornback skate        | Beukhof et al. (2019)        | Ebert & Bizarro (2007)      | Ebert & Dando (2020)             |
| Brown skate            | Beukhof et al. (2019)        | Ebert & Bizarro (2007)      | Ebert & Dando (2020)             |
| Small-spotted catshark | Beukhof et al. (2019)        | Cortes (1999)               | Beukhof et al. (2019)            |
| Nursehound             | Beukhof et al. (2019)        | Cortes (1999)               | Beukhof et al. (2019)            |

|                 |                       |                        |                      |
|-----------------|-----------------------|------------------------|----------------------|
| Spurdog         | Beukhof et al. (2019) | Cortes (1999)          | Ebert & Dando (2020) |
| Marbled torpedo | Beukhof et al. (2019) | Jacobsen et al. (2013) | Ebert & Dando (2020) |
| Smooth-hound    | Beukhof et al. (2019) | Cortes (1999)          | Ebert & Dando (2020) |
